# Supplementary material for: Selective supramolecular assembly of multifunctional ligands on a Cu(111) surface: metallacycles, propeller trimers and linear chains
Source: Royal Society of Chemistry journal article supplement (doi:10.1039/c1cc12294k), 2011-01-01
Supplement: c1cc12294k.pdf [file c1cc12294k.pdf]

### Supplementary Information

Selective supramolecular assembly of multifunctional ligands on a Cu(111) surface:  
metallacycles, propeller trimers and linear chains

Wei-hua Wang,<sup>\*a</sup> Shiyong Wang,<sup>a</sup> Yuning Hong,<sup>b</sup> Ben Zhong Tang<sup>b</sup> and Nian Lin<sup>a</sup>

<sup>a</sup> Department of Physics, The Hong Kong University of Science and Technology, Hong Kong, China.

<sup>b</sup> Department of Chemistry, The Hong Kong University of Science and Technology, Hong Kong, China.

Scanning tunneling spectra on metallacycle

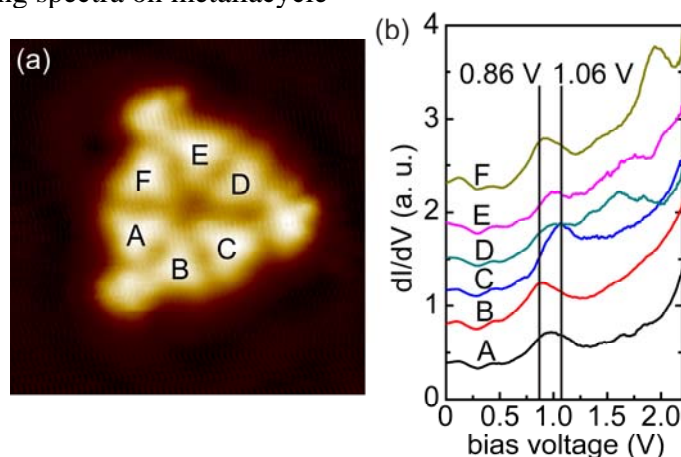

Figure S1 (a) (8 nm × 8 nm, -0.2 V, 0.5 nA) High-resolution STM image of a triangle metallacycle formed by 3 *cis*-BTP-TPE molecules through coordination with Cu adatoms.

(b) Scanning tunneling spectra ( $dI/dV$  spectra) measured at *tpy* groups in the triangle metallacycle as marked by A~F in (a). The solid lines indicate the range of the electronic state.

We have conducted scanning tunneling spectroscopy measurements on the terpyridine (*tpy*) groups in the metallacycle shown in Fig. S1(a). Each of the six *tpy* groups has an electronic state in the range of 0.86 V to 1.06 V. Based on our previous work,<sup>1,2</sup> on Cu(111) surface, non-coordinated *tpy* group has an electronic state at 1.3 V; the *tpy* group coordinated with Cu atom has a down-shifted electronic state at 0.9 V~ 1.0 V. Thus we believe the *cis*-BTP-TPE molecules in the metallacycle are connected by Cu-coordination.

1. W. H. Wang, Y. N. Hong, X. Q. Shi, C. Minot, M. A. Van Hove, B. Z. Tang and N. Lin, *J. Phys. Chem. Lett.*, 2010, **1**, 2295-2298.
2. W. H. Wang, X. Q. Shi, C. S. Lin, R. Q. Zhang, C. Minot, M. A. Van Hove, Y. N. Hong, B. Z. Tang and N. Lin, *Phys. Rev. Lett.*, 2010, **105**, 126801.
